# Supplementary material for: Video-based formative and summative assessment of surgical tasks using deep learning
Source: Springer Nature journal article supplement (doi:10.1038/s41598-022-26367-9), 2023-01-19
Supplement: MOESM1 [file 41598_2022_26367_MOESM1_ESM.pdf]

# Supplementary Materials for

## Video-based Formative and Summative Assessment of Surgical Tasks using Deep Learning

Erim Yanik<sup>1</sup>, Uwe Kruger<sup>1</sup>, Xavier Intes<sup>1</sup>, Rahul Rahul<sup>1</sup>, and Suvrano De<sup>1\*</sup>

<sup>1</sup> Department of Mechanical, Aerospace, and Nuclear Engineering/Center for Modeling, Simulation, and Imaging for Medicine (CeMSIM)/Rensselaer Polytechnic Institute/Troy/12180.

<sup>2</sup> Biomedical Engineering Department/Center for Modeling, Simulation, and Imaging for Medicine (CeMSIM)/Rensselaer Polytechnic Institute/Troy/12180.

### Supplementary Information

**Hyperparameter Selection.** During training the Mask R-CNN, the learning rate is initiated as 0.001, and the weight decay and momentum are 0.0003 and 0.9, respectively. The learning rate decreased by a factor of ten after the 20<sup>th</sup> epoch.

To extract salient features from motion sequences via the DAE, binary cross-entropy is minimized with a learning rate of 0.001. On the other hand, the classifier is trained with a mean squared error loss function when predicting the FLS scores and cosine similarity when performing classification, as it is shown to provide superior results on datasets with a limited sample size when trained from scratch<sup>1</sup>. The learning rate is 0.0002. Further, an Adam optimizer is used when training the model. Finally, the Scaled Exponential Linear Unit (SELU)<sup>2</sup> activation function is used for all the convolutional layers unless stated otherwise in Fig. S4. Finally, L2 regularizing (0.00001) is applied as both the kernel and activity regularizer<sup>2</sup>.

## Supplementary Figures

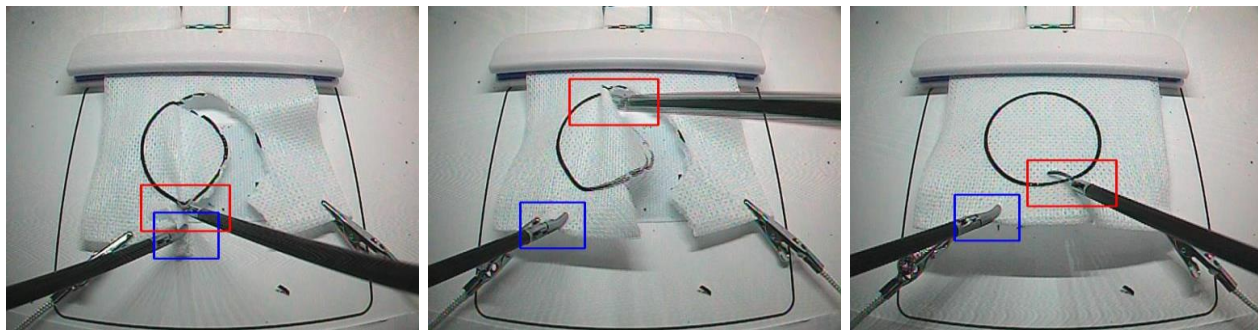

**Fig. S1. Mask R-CNN output.** Sample regressed bounding boxes of the tools. It is observed that the Mask R-CNN can successfully locate the tools when there is an intersection (left), blurry image (middle), and different tool angles (right).

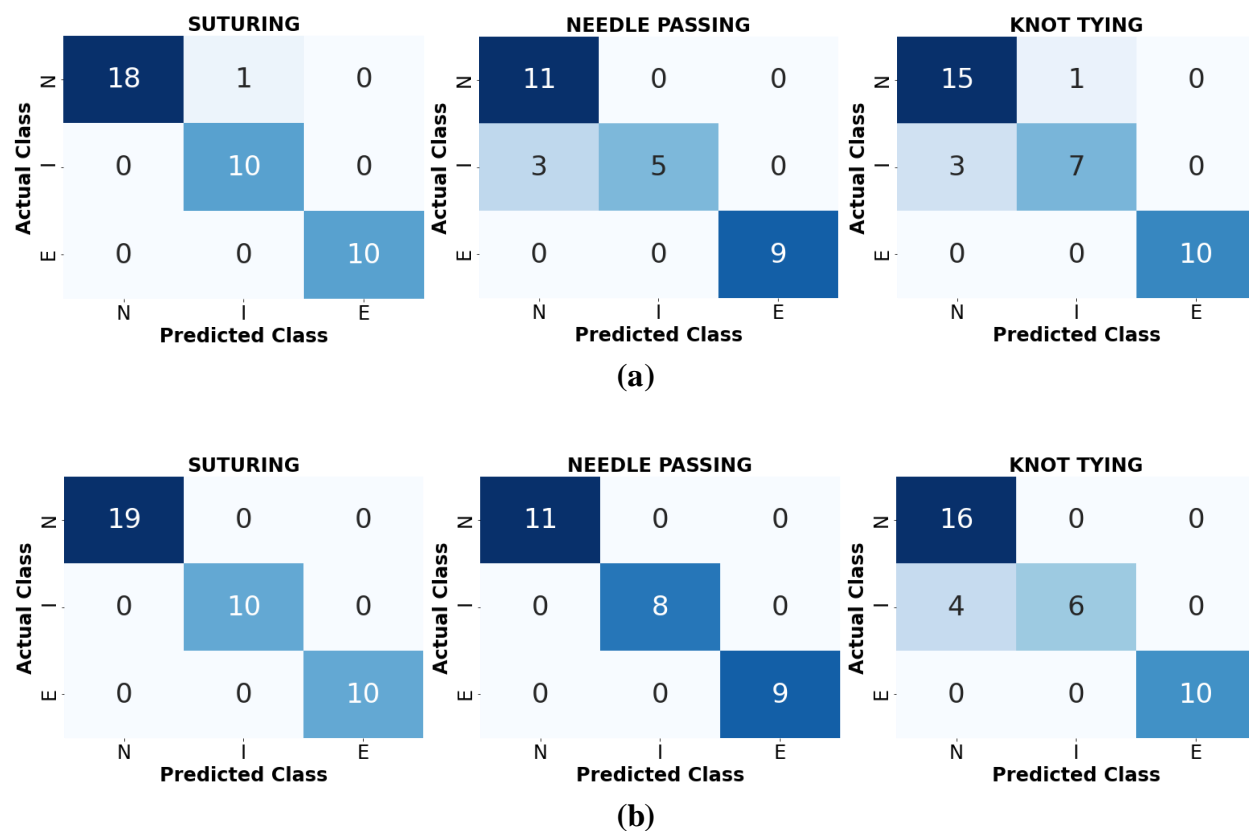

**Fig. S2. Confusion matrices for surgical datasets.** (a) For the JIGSAWS dataset via the LOUO CV scheme. Here, N, I, and E stand for Novice, Intermediate, and Expert, respectively. (b) For the JIGSAWS dataset via the LOSO CV scheme.

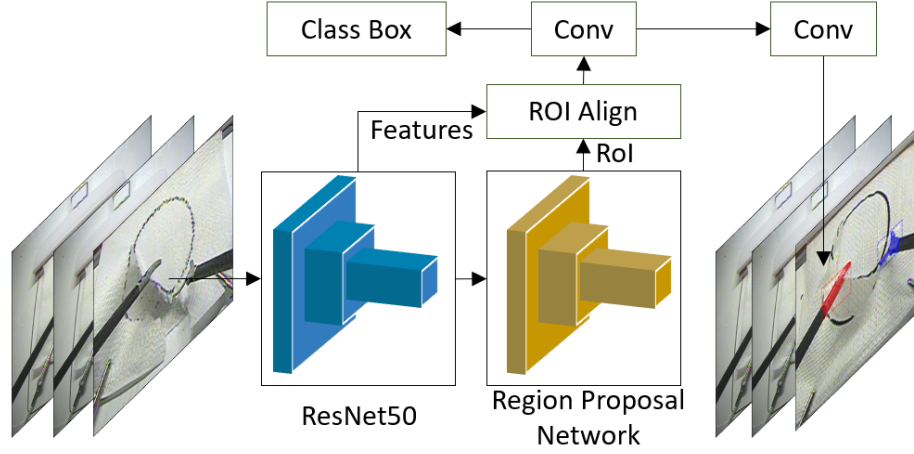

**Fig. S3. Mask R-CNN architecture.** It consists of a CNN-backbone, ResNet50, and Region Proposal Network (RPN) to output object properties.

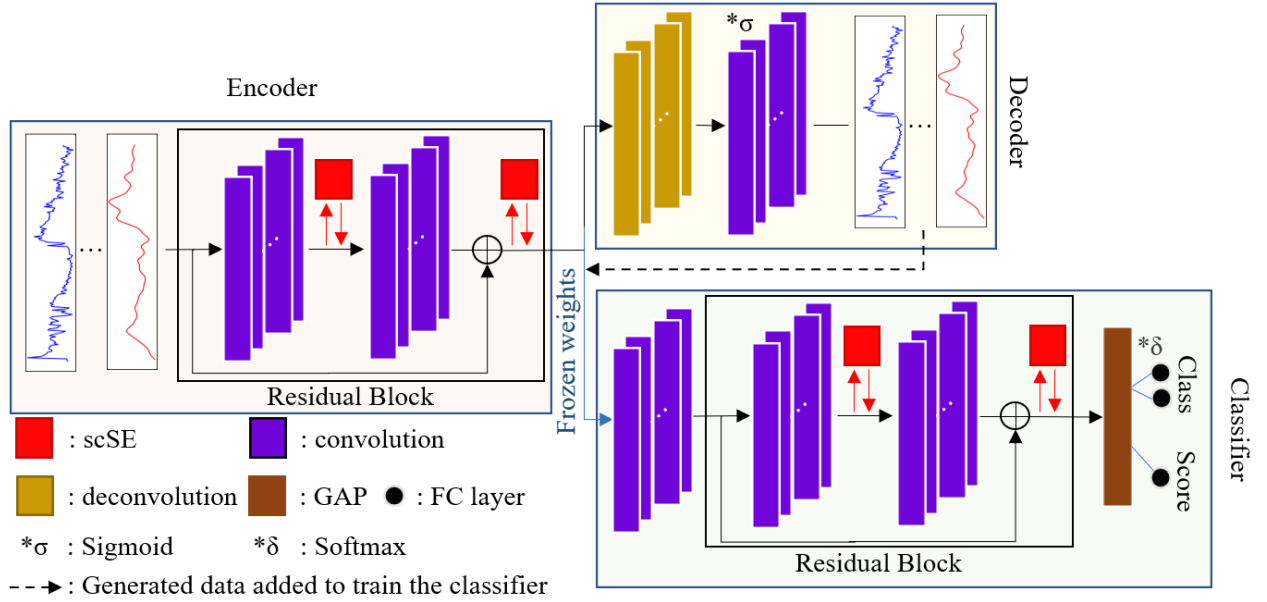

**Fig. S4. The DAE and classifier structure.** The figure illustrates the encoder, decoder, and classifier in their utilized order.

## Supplementary Tables

**Table S1. FLS score statistics based on binary classes for the PC datasets.**

| Dataset    |         | No. of samples | Mean Duration (sec) | STD Duration (sec) | Mean FLS score | STD FLS score |
|------------|---------|----------------|---------------------|--------------------|----------------|---------------|
| Main       | Pass    | 1842           | 73.5                | 25.0               | 208.3          | 24.3          |
|            | Fail    | 213            | 161.9               | 36.9               | 115.3          | 33.7          |
|            | Overall | 2,055          | 82.7                | 37.8               | 198.7          | 38.1          |
| Additional | Pass    | 202            | 86.0                | 23.4               | 185.2          | 19.3          |
|            | Fail    | 105            | 148.5               | 33.0               | 121.8          | 31.0          |
|            | Overall | 307            | 107.4               | 40.2               | 163.5          | 38.5          |

**Table S2. Breakdown of Spearman correlation coefficients,  $\rho_s$ , for OSATS scores prediction via the LOUO CV.**

| Task | Respect for tissue | Suture/needle handling | Time and motion | Flow of operation | Overall performance | Quality of final product |
|------|--------------------|------------------------|-----------------|-------------------|---------------------|--------------------------|
| ST   | 0.25 <sup>‡</sup>  | 0.67                   | 0.66            | 0.59              | 0.53                | 0.43                     |
| NP   | 0.69               | 0.70                   | 0.89            | 0.76              | 0.72                | 0.68                     |
| KT   | 0.75               | 0.78                   | 0.86            | 0.78              | 0.76                | 0.87                     |

<sup>‡</sup>p > 0.05. ST: suturing, NP: needle passing, KT: knot tying.

**Table S3. Classification scores (<0.97) for LOSO CV and other CV schemes.**

| Author                                      | Method                  | Suturing   | Needle Passing | Knot Tying   | Mean         |
|---------------------------------------------|-------------------------|------------|----------------|--------------|--------------|
| Lajko <i>et al.</i> <sup>3</sup> [2021]     | CNN                     | 0.807      | 0.797          | 0.804        | 0.803        |
| Anh <i>et al.</i> <sup>4</sup> [2020]       | Autoencoder             | 0.835      | 0.823          | 0.806        | 0.821        |
| Lajko <i>et al.</i> <sup>3</sup> [2021]     | CNN + LSTM              | 0.816      | 0.832          | 0.828        | 0.825        |
| Lajko <i>et al.</i> <sup>3</sup> [2021]     | ResNet                  | 0.819      | 0.842          | 0.835        | 0.832        |
| Anh <i>et al.</i> <sup>4</sup> [2020]       | LSTM                    | 0.951      | 0.915          | 0.896        | 0.921        |
| Wang and Fey <sup>5</sup> [2018]            | CNN                     | 0.925      | 0.954          | 0.913        | 0.931        |
| Anh <i>et al.</i> <sup>4</sup> [2020]       | CNN-LSTM                | 0.964      | 0.934          | 0.910        | 0.936        |
| Anh <i>et al.</i> <sup>4</sup> [2020]       | LSTM                    | 0.965      | 0.941          | 0.912        | 0.940        |
| Soleymani <i>et al.</i> <sup>6</sup> [2021] | CNN + FFT (4-fold)      | N/A        | N/A            | N/A          | 0.942        |
| Anh <i>et al.</i> <sup>4</sup> [2020]       | CNN                     | 0.968      | 0.954          | 0.927        | 0.950        |
| Wang and Fey <sup>7</sup> [2018]            | CNN-GRU                 | N/A        | N/A            | N/A          | 0.960        |
| <b>VBA-Net</b>                              | <b>DAE + Classifier</b> | <b>1.0</b> | <b>1.0</b>     | <b>0.926</b> | <b>0.975</b> |

**DAE:** Denoising autoencoder, **FFT:** Fast Fourier Transform, **HMM:** Hidden Markov Model

**Table S4. Breakdown of Spearman correlation coefficients,  $\rho_s$ , for OSATS score prediction via the LOSO CV.**

| Task      | Respect for tissue | Suture/needle handling | Time and motion | Flow of operation | Overall performance | Quality of final product |
|-----------|--------------------|------------------------|-----------------|-------------------|---------------------|--------------------------|
| <b>ST</b> | 0.51               | 0.63                   | 0.64            | 0.57              | 0.58                | 0.68                     |
| <b>NP</b> | 0.52               | 0.77                   | 0.65            | 0.69              | 0.55                | 0.43                     |
| <b>KT</b> | 0.68               | 0.65                   | 0.76            | 0.59              | 0.80                | 0.64                     |

ST: suturing, NP: needle passing, KT: knot tying.

## References

1. Barz, B. & Denzler, J. Deep learning on small datasets without pre-training using cosine loss. *Proc. - 2020 IEEE Winter Conf. Appl. Comput. Vision, WACV 2020* 1360–1369 (2020). doi:10.1109/WACV45572.2020.9093286
2. Castro, D., Pereira, D., Zanchettin, C., MacEdo, D. & Bezerra, B. L. D. Towards Optimizing Convolutional Neural Networks for Robotic Surgery Skill Evaluation. *Proc. Int. Jt. Conf. Neural Networks* **2019-July**, 1–8 (2019).
3. Lajko, G., Elek, R. N. & Haidegger, T. Endoscopic Image-Based Skill Assessment in Robot-Assisted Minimally Invasive Surgery. *Foot Ankle Spec.* **14**, 153–157 (2021).
4. Anh, N. X., Nataraja, R. M. & Chauhan, S. Towards near real-time assessment of surgical skills: A comparison of feature extraction techniques. *Comput. Methods Programs Biomed.* **187**, 105234 (2020).
5. Wang, Z. & Majewicz Fey, A. Deep learning with convolutional neural network for objective skill evaluation in robot-assisted surgery. *Int. J. Comput. Assist. Radiol. Surg.* **13**, 1959–1970 (2018).
6. Soleymani, A. *et al.* Surgical Skill Evaluation from Robot-Assisted Surgery Recordings. *2021 Int. Symp. Med. Robot. ISMR 2021* 1–6 (2021). doi:10.1109/ISMR48346.2021.9661527
7. Wang, Z. & Fey, A. M. SATR-DL: Improving Surgical Skill Assessment and Task Recognition in Robot-Assisted Surgery with Deep Neural Networks. *Proc. Annu. Int. Conf. IEEE Eng. Med. Biol. Soc. EMBS* **2018-July**, 1793–1796 (2018).
